# Supplementary material
Source: Springer Nature journal article supplement (https://www.springerprofessional.de/resource/supplementary/13638_2011_204_MOESM12_ESM.pdf/11897206)

$\|M-M_{\infty}\|$ 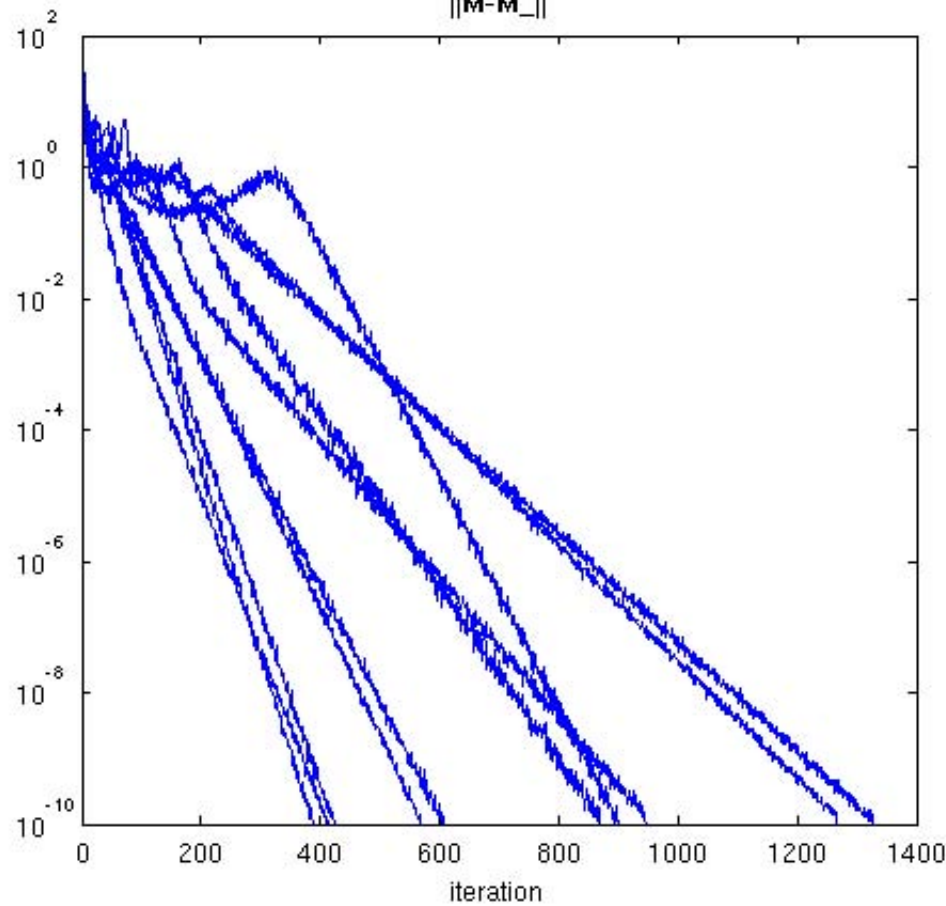

Supplement: MOESM12 [file 11897206]
